# Supplementary material for: SKINREMS—A New Method for Assessment of the Niacin Skin Flush Test Response in Schizophrenia
Source: PubMed Central journal article supplement (PMC7356909; doi:10.3390/jcm9061848), 2020-06-13
Supplement: jcm-09-01848-s001.pdf [file jcm-09-01848-s001.pdf]

**Table S1.** Differences in response to niacin solution between examined groups

| <i>Schizophrenia vs Healthy Control</i> |                             |                                                                      |                                                                      |                            |
|-----------------------------------------|-----------------------------|----------------------------------------------------------------------|----------------------------------------------------------------------|----------------------------|
| <b>Component</b>                        | <b>Concentration of AMN</b> | <i>Statistic values</i>                                              |                                                                      |                            |
|                                         |                             | <i>Time effect</i>                                                   | <i>Group effect</i>                                                  | <i>Time x Group effect</i> |
| <b>Surface</b>                          | 0.001M                      | <b>F=5.4567, <math>p=0.001</math>, <math>\eta^2_p=0.034</math></b>   | <b>F=23.44, <math>p&lt;0.001</math>, <math>\eta^2_p=0.056</math></b> | NS                         |
|                                         | 0.01M                       | <b>F=18.62, <math>p&lt;0.001</math>, <math>\eta^2_p=0.124</math></b> | <b>F=25.32, <math>p&lt;0.001</math>, <math>\eta^2_p=0.060</math></b> | NS                         |
|                                         | 0.1M                        | <b>F=9.33, <math>p&lt;0.001</math>, <math>\eta^2_p=0.066</math></b>  | <b>F=12.49, <math>p&lt;0.001</math>, <math>\eta^2_p=0.031</math></b> | NS                         |
| <b>Red colour</b>                       | 0.001M                      | NS                                                                   | NS                                                                   | NS                         |
|                                         | 0.01M                       | NS                                                                   | NS                                                                   | NS                         |
|                                         | 0.1M                        | NS                                                                   | NS                                                                   | NS                         |
| <b>Green colour</b>                     | 0.001M                      | <b>F=4.11, <math>p=0.007</math>, <math>\eta^2_p=0.030</math></b>     | NS                                                                   | NS                         |
|                                         | 0.01M                       | F=3.59, $p=0.014$                                                    | <b>F=8.92, <math>p=0.003</math>, <math>\eta^2_p=0.022</math></b>     | NS                         |
|                                         | 0.1M                        | NS                                                                   | F=4.03, $p=0.046$                                                    | NS                         |
| <b>Blue colour</b>                      | 0.001M                      | NS                                                                   | NS                                                                   | NS                         |
|                                         | 0.01M                       | NS                                                                   | F=5.79, $p=0.017$                                                    | NS                         |
|                                         | 0.1M                        | NS                                                                   | NS                                                                   | NS                         |
| <b>Hue</b>                              | 0.001M                      | F=3.67, $p=0.012$                                                    | NS                                                                   | NS                         |
|                                         | 0.01M                       | NS                                                                   | NS                                                                   | NS                         |
|                                         | 0.1M                        | NS                                                                   | NS                                                                   | NS                         |
| <b>Saturation</b>                       | 0.001M                      | F=3.63, $p=0.013$                                                    | NS                                                                   | NS                         |
|                                         | 0.01M                       | NS                                                                   | <b>F=8.60, <math>p=0.004</math>, <math>\eta^2_p=0.021</math></b>     | NS                         |
|                                         | 0.1M                        | NS                                                                   | NS                                                                   | NS                         |
| <b>Value</b>                            | 0.001M                      | NS                                                                   | NS                                                                   | NS                         |
|                                         | 0.01M                       | NS                                                                   | NS                                                                   | NS                         |

|                         |        |                                                                     |                                                                      |    |
|-------------------------|--------|---------------------------------------------------------------------|----------------------------------------------------------------------|----|
|                         | 0.1M   | NS                                                                  | NS                                                                   | NS |
| <b>Red chrominance</b>  | 0.001M | <b>F=6.08, <math>p&lt;0.001</math>, <math>\eta^2_p=0.044</math></b> | <b>F=8.60, <math>p=0.004</math>, <math>\eta^2_p=0.021</math></b>     | NS |
|                         | 0.01M  | <b>F=6.33, <math>p&lt;0.001</math>, <math>\eta^2_p=0.046</math></b> | <b>F=17.40, <math>p&lt;0.001</math>, <math>\eta^2_p=0.042</math></b> | NS |
|                         | 0.1M   | NS                                                                  | F=5.10, $p=0.025$                                                    | NS |
| <b>Blue chrominance</b> | 0.001M | NS                                                                  | NS                                                                   | NS |
|                         | 0.01M  | NS                                                                  | F=5.94, $p=0.015$                                                    | NS |
|                         | 0.1M   | NS                                                                  | NS                                                                   | NS |

*Bipolar Disorder vs Healthy Control*

| <b>Component</b>    | <b>Concentration of AMN</b> | <i>Statistic values</i>                                             |                                                                      |                            |
|---------------------|-----------------------------|---------------------------------------------------------------------|----------------------------------------------------------------------|----------------------------|
|                     |                             | <i>Time effect</i>                                                  | <i>Group effect</i>                                                  | <i>Time x group effect</i> |
| <b>Surface</b>      | 0.001M                      | NS                                                                  | <b>F=7.50, <math>p=0.007</math>, <math>\eta^2_p=0.026</math></b>     | NS                         |
|                     | 0.01M                       | <b>F=7.46, <math>p&lt;0.001</math>, <math>\eta^2_p=0.073</math></b> | <b>F=12.18, <math>p&lt;0.001</math>, <math>\eta^2_p=0.041</math></b> | NS                         |
|                     | 0.1M                        | <b>F=6.89, <math>p&lt;0.001</math>, <math>\eta^2_p=0.068</math></b> | NS                                                                   | NS                         |
| <b>Red colour</b>   | 0.001 M                     | NS                                                                  | NS                                                                   | NS                         |
|                     | 0.01 M                      | NS                                                                  | NS                                                                   | NS                         |
|                     | 0.1 M                       | NS                                                                  | NS                                                                   | NS                         |
| <b>Green colour</b> | 0.001M                      | NS                                                                  | NS                                                                   | NS                         |
|                     | 0.01M                       | NS                                                                  | <b>F=7.53, <math>p=0.006</math>, <math>\eta^2_p=0.026</math></b>     | NS                         |
|                     | 0.1 M                       | NS                                                                  | NS                                                                   | NS                         |
| <b>Blue colour</b>  | 0.001M                      | NS                                                                  | NS                                                                   | NS                         |
|                     | 0.01M                       | NS                                                                  | F=4.58, $p=0.033$                                                    | NS                         |
|                     | 0.1M                        | NS                                                                  | NS                                                                   | NS                         |
| <b>Hue</b>          | 0.001M                      | NS                                                                  | NS                                                                   | NS                         |
|                     | 0.01M                       | NS                                                                  | NS                                                                   | NS                         |

|                         |        |                   |                   |    |
|-------------------------|--------|-------------------|-------------------|----|
|                         | 0.1M   | NS                | NS                | NS |
| <b>Saturation</b>       | 0.001M | F=2.70, $p=0.046$ | NS                | NS |
|                         | 0.01M  | NS                | NS                | NS |
|                         | 0.1M   | NS                | NS                | NS |
| <b>Value</b>            | 0.001M | NS                | NS                | NS |
|                         | 0.01M  | NS                | NS                | NS |
|                         | 0.1M   | NS                | NS                | NS |
| <b>Red chrominance</b>  | 0.001M | F=3.88, $p=0.010$ | NS                | NS |
|                         | 0.01M  | NS                | F=5.42, $p=0.021$ | NS |
|                         | 0.1M   | NS                | NS                | NS |
| <b>Blue chrominance</b> | 0.001M | NS                | NS                | NS |
|                         | 0.01M  | NS                | F=4.57, $p=0.033$ | NS |
|                         | 0.1M   | NS                | NS                | NS |

*Schizophrenia vs Bipolar Disorder*

| <b>Component</b>    | <b>Concentration of AMN</b> | <i>Statistic values</i>                 |                     |                            |
|---------------------|-----------------------------|-----------------------------------------|---------------------|----------------------------|
|                     |                             | <i>Time effect</i>                      | <i>Group effect</i> | <i>Time x group effect</i> |
| <b>Surface</b>      | 0.001M                      | F=6.23, $p<0.001$ ,<br>$\eta^2_p=0.054$ | NS                  | NS                         |
|                     | 0.01M                       | F=6.72, $p<0.001$ ,<br>$\eta^2_p=0.058$ | NS                  | NS                         |
|                     | 0.1M                        | F=5.16, $p=0.002$ ,<br>$\eta^2_p=0.045$ | NS                  | NS                         |
| <b>Red colour</b>   | 0.001M                      | NS                                      | NS                  | NS                         |
|                     | 0.01M                       | NS                                      | NS                  | NS                         |
|                     | 0.1M                        | NS                                      | NS                  | NS                         |
| <b>Green colour</b> | 0.001M                      | NS                                      | F=5.24, $p=0.023$   | NS                         |
|                     | 0.01M                       | F=3.77, $p=0.011$                       | NS                  | NS                         |
|                     | 0.1M                        | NS                                      | NS                  | NS                         |
| <b>Blue colour</b>  | 0.001M                      | NS                                      | NS                  | NS                         |

|                         |        |                                                            |                                                         |    |
|-------------------------|--------|------------------------------------------------------------|---------------------------------------------------------|----|
|                         | 0.01M  | NS                                                         | NS                                                      | NS |
|                         | 0.1M   | NS                                                         | NS                                                      | NS |
| <b>Hue</b>              | 0.001M | NS                                                         | NS                                                      | NS |
|                         | 0.01M  | NS                                                         | NS                                                      | NS |
|                         | 0.1M   | NS                                                         | NS                                                      | NS |
| <b>Saturation</b>       | 0.001M | <b>F=5.09, p=0.002,<br/><math>\eta^2_p=0.044</math></b>    | NS                                                      | NS |
|                         | 0.01M  | NS                                                         | NS                                                      | NS |
|                         | 0.1M   | NS                                                         | NS                                                      | NS |
| <b>Value</b>            | 0.001M | NS                                                         | NS                                                      | NS |
|                         | 0.01M  | NS                                                         | NS                                                      | NS |
|                         | 0.1M   | NS                                                         | NS                                                      | NS |
| <b>Red chrominance</b>  | 0.001M | <b>F=7.03, p&lt;0.001,<br/><math>\eta^2_p=0.060</math></b> | <b>F=9.68, p=0.002,<br/><math>\eta^2_p=0.029</math></b> | NS |
|                         | 0.01M  | <b>F=4.50, p=0.004,<br/><math>\eta^2_p=0.039</math></b>    | NS                                                      | NS |
|                         | 0.1M   | NS                                                         | NS                                                      | NS |
| <b>Blue chrominance</b> | 0.001M | NS                                                         | NS                                                      | NS |
|                         | 0.01M  | NS                                                         | NS                                                      | NS |
|                         | 0.1M   | NS                                                         | NS                                                      | NS |

AMN - aqueous methyl nicotinate;  $\eta^2_p$  - partial eta squared
